# Supplementary material
Source: PubMed Central journal article supplement (PMC4888909)

## Supplementary Information

### Supplemental Figure S1.

#### Tumor cell model for integrin $\alpha v \beta 3$ activation

Flow cytometry analysis of tumor cell variants expressing defined levels and affinity states of integrin  $\alpha v \beta 3$ . The cell variants were derived from MDA-MB 435 human breast cancer cells. Left panels: Overall integrin  $\alpha v \beta 3$  heterodimer expression (Mab VNR1, does not distinguish between high and low affinity  $\alpha v \beta 3$ ). Right panels: integrin  $\alpha v \beta 3$  activation state measured by binding of soluble RGD-ligand mimetic scFv antibody Bc-15 which behaves like a natural ligand and is specific for  $\alpha v \beta 3$ . Lack of scFv binding in the absence of divalent cations (blue lines = no cations) indicates cation dependence. Intrinsic activation of  $\alpha v \beta 3$  (high affinity) allows scFv binding in the presence of calcium (1mM) (red line =  $\text{Ca}^{2+}$ ), while low or no binding in calcium indicates low affinity  $\alpha v \beta 3$  in cells that express the receptor. ScFv binding in the presence manganese (50  $\mu\text{M}$ ) (green line =  $\text{Mn}^{2+}$ ) is maximized, regardless of the intrinsic  $\alpha v \beta 3$  activation state, as long as the cells are  $\alpha v \beta 3$  positive. Bold red +/- signs on the right indicate the  $\alpha v \beta 3$  activation state.

Figure S1

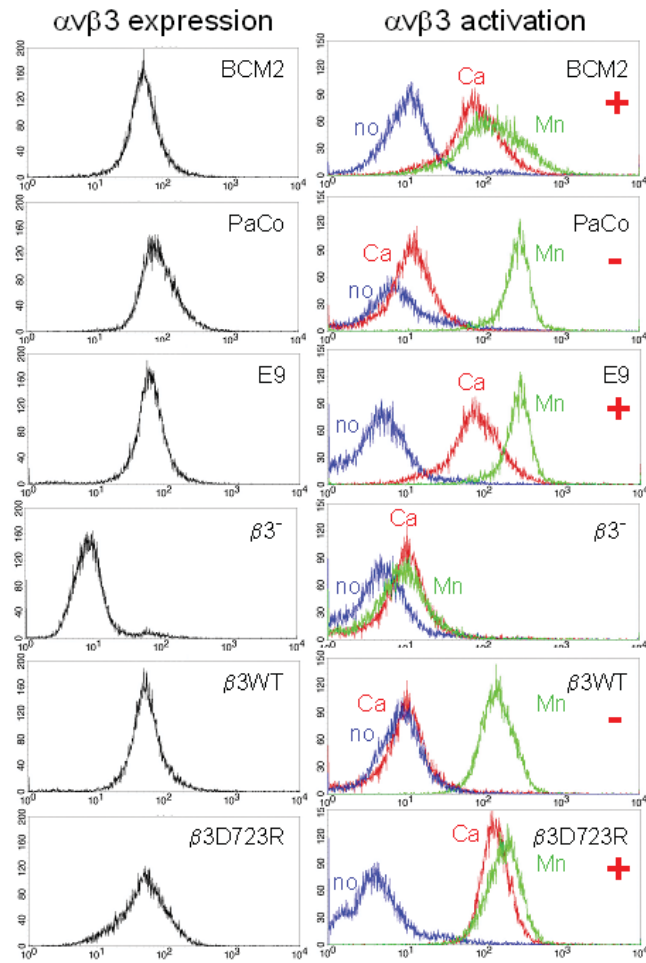

Supplement: NIHMS786381-supplement-01.pdf [file NIHMS786381-supplement-01.pdf]
